# Supplementary material
Source: PubMed Central journal article supplement (PMC8474248)
Supplement: mmc2.pdf [file mmc2.pdf]

# Supplemental Information

# Figure S1

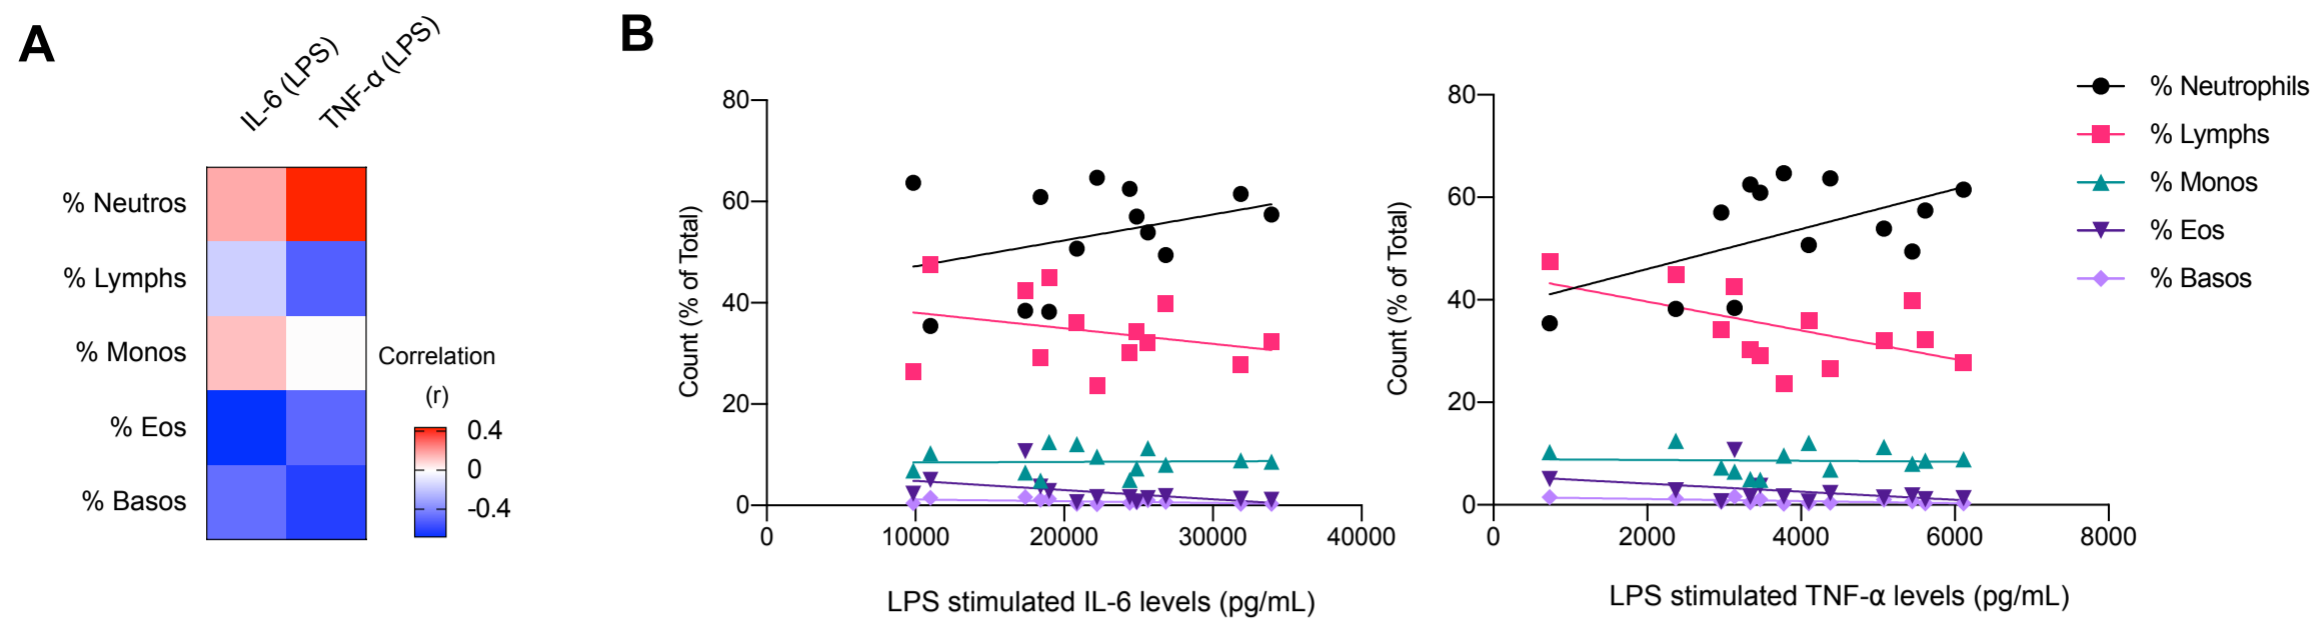

**Figure S1. Correlation between blood cell subtypes at baseline and LPS-stimulated cytokine response.** (A) Correlation coefficient (Spearman  $r$ ) between % baseline cell subtype distribution in and LPS-stimulated IL-6 and TNF- $\alpha$  levels in whole blood from  $n=13$  individuals. Positive correlations are red and negative correlations are blue. (B) Spearman correlation along with linear regression lines showing direction of association between stimulated cytokines (IL-6 and TNF $\alpha$ ) and distribution of cell subtypes.

**Figure S2**

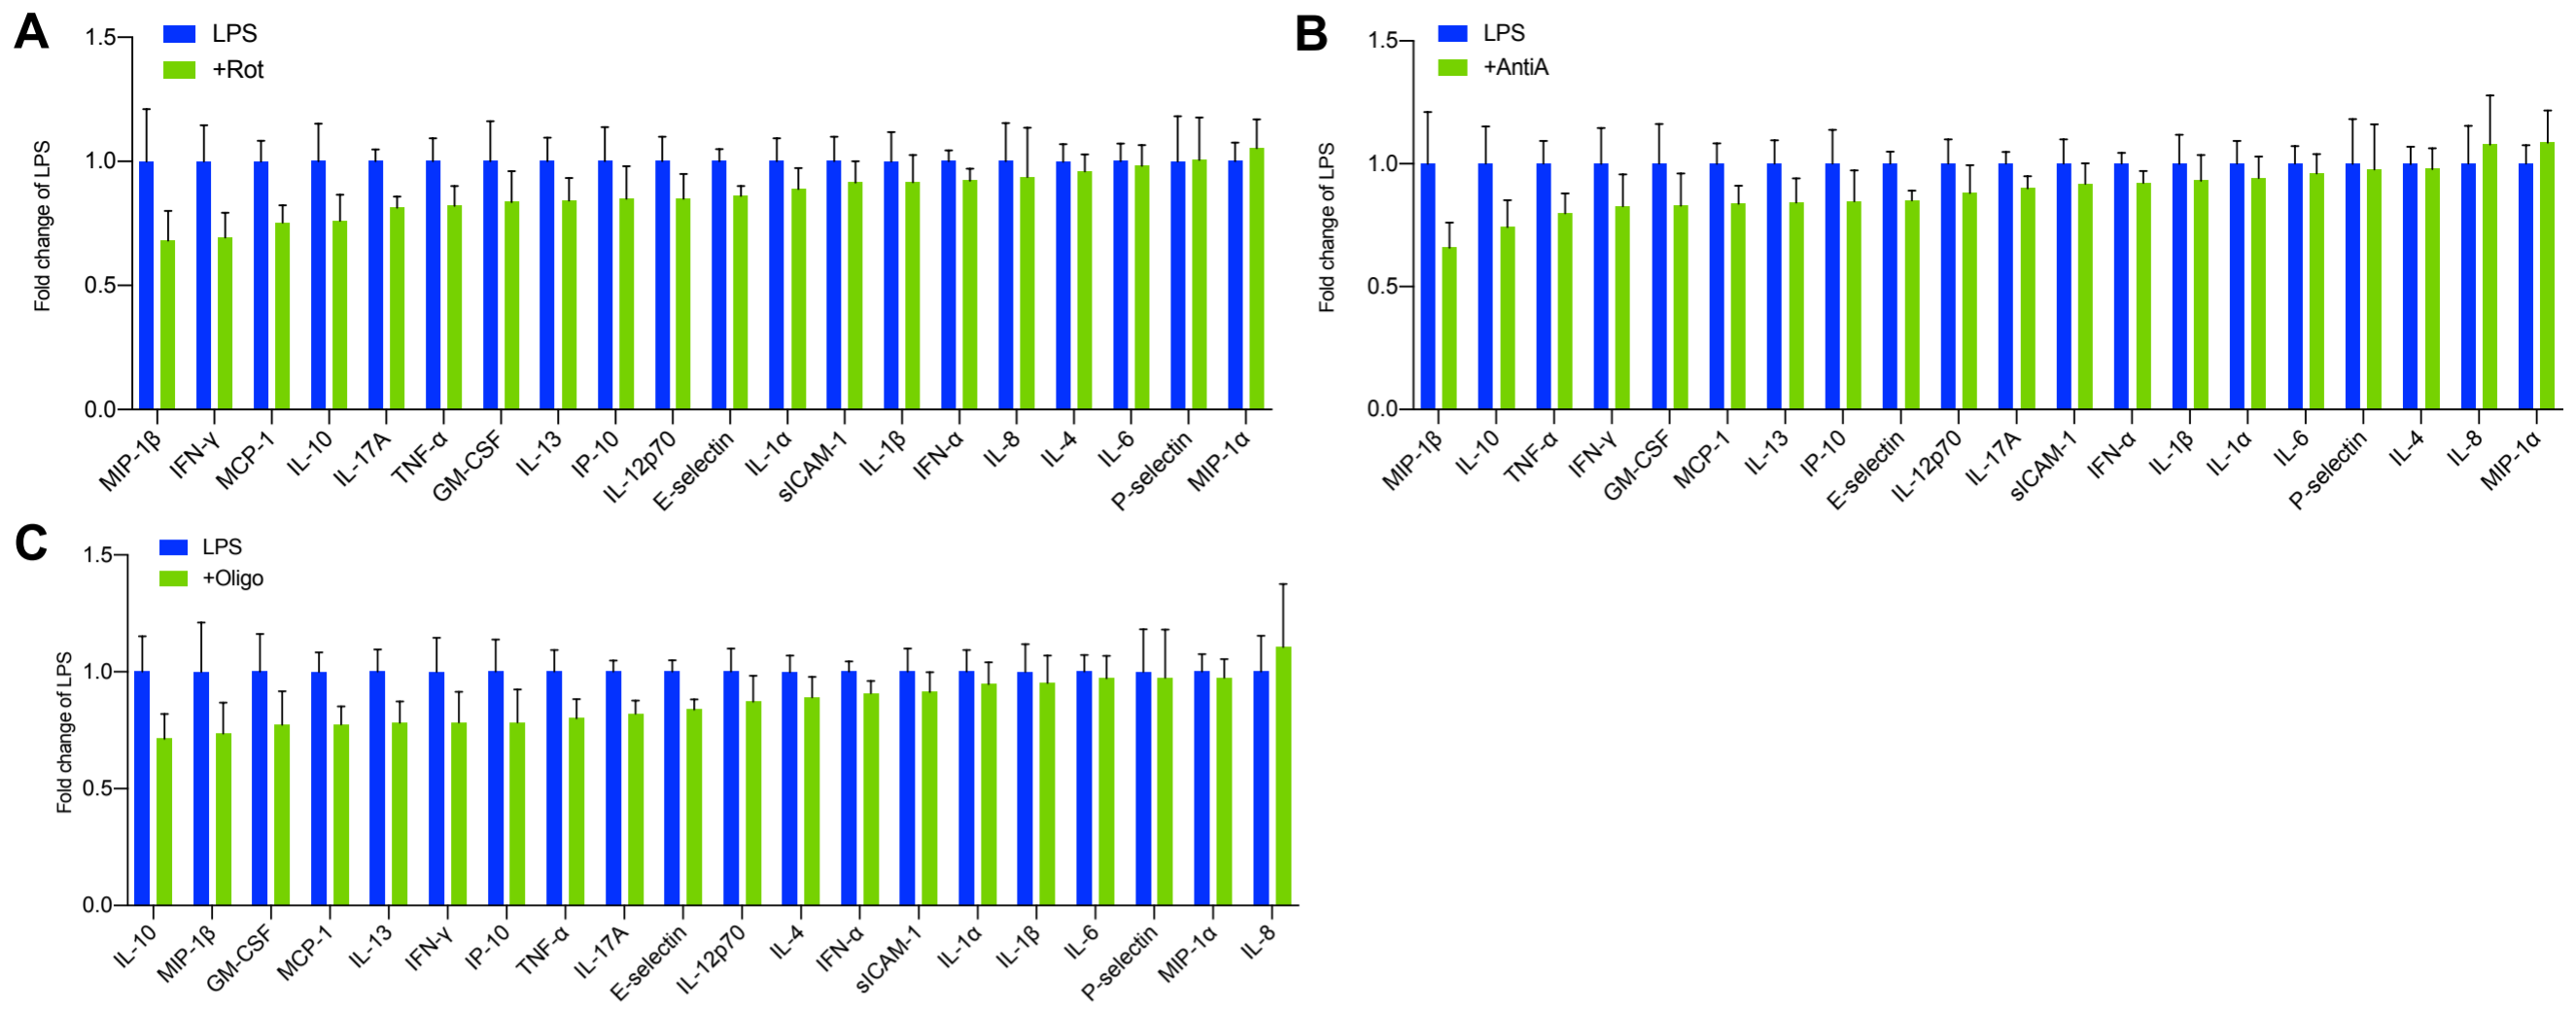

**Figure S2. Mitochondrial respiration inhibitors alter LPS-stimulated cytokine response. (A-C)** Fold change of LPS-stimulated cytokine levels upon respiration inhibition (green bars) by Rotenone (Complex I), Antimycin A (Complex III) and Oligomycin (Complex V) relative to LPS only (blue bars). The cytokines are ranked from most- to least- suppressed by an inhibitor. Data are mean $\pm$ SEM of n=19-20 individuals.

Figure S3

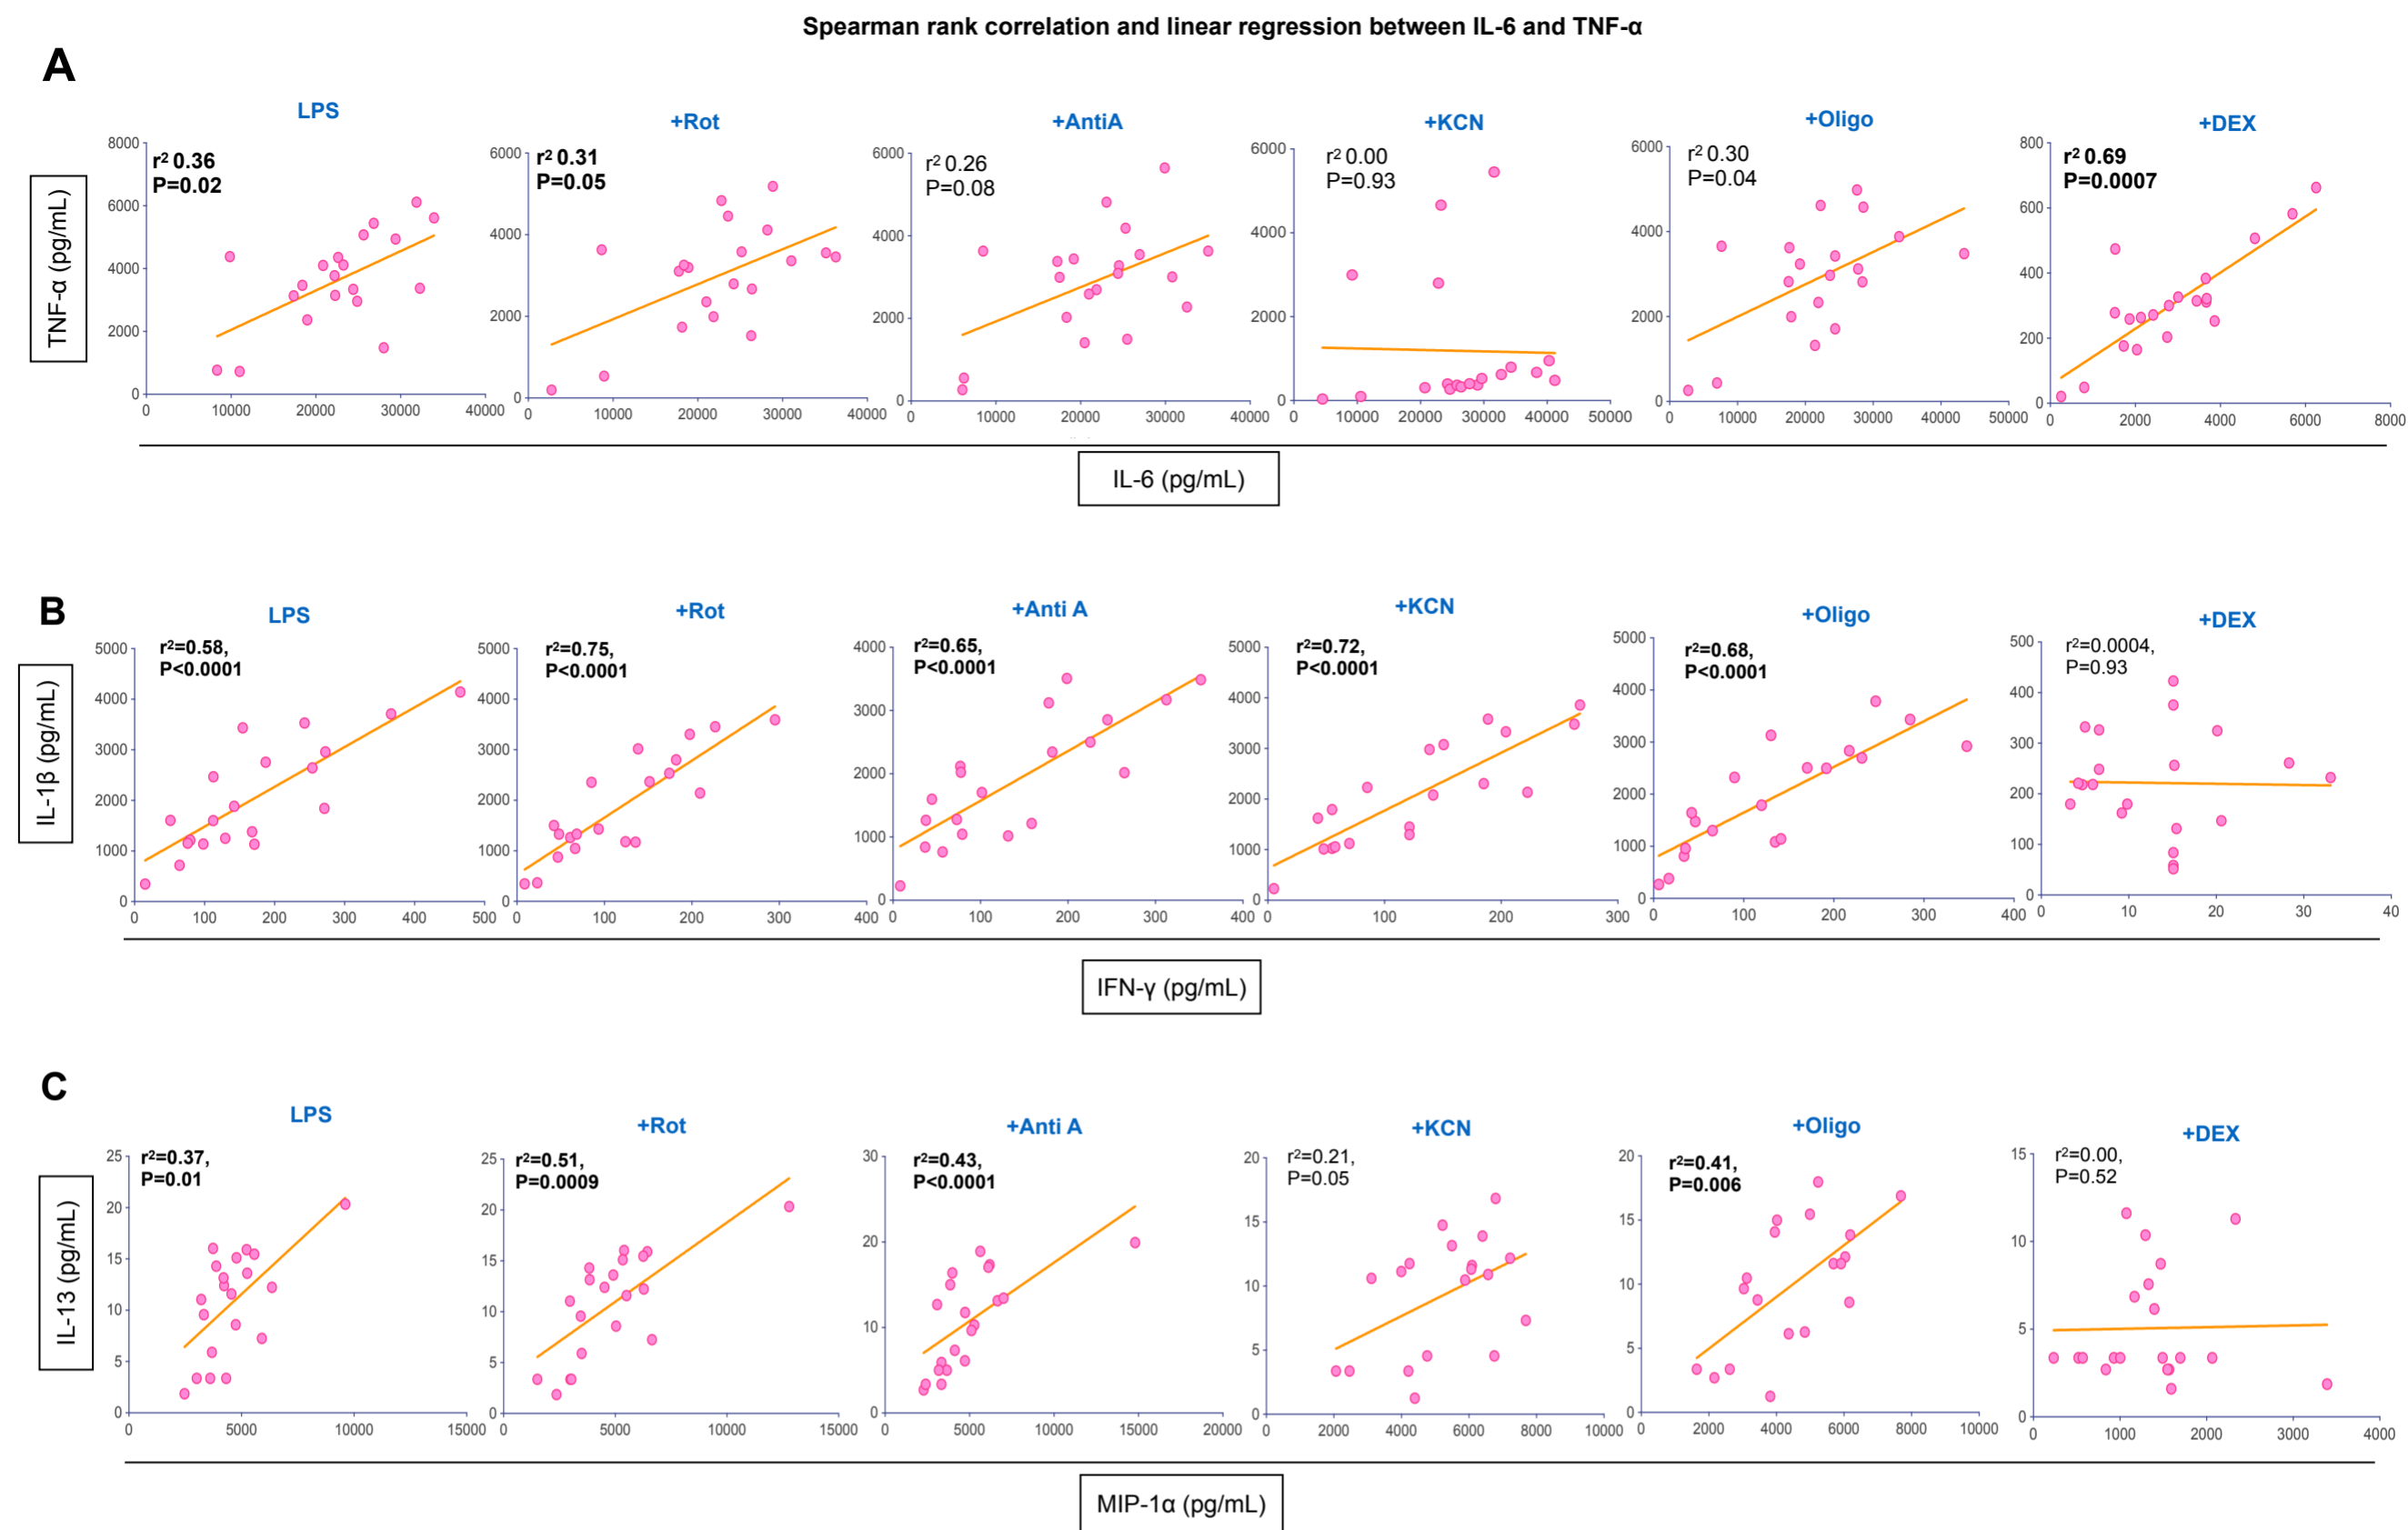

**Figure S3. Mitochondrial respiration defects alter inter-cytokine associations in leukocytes.** (A-C) Effect of mitochondrial respiration inhibition and DEX treatment on inter-cytokine correlations. The P values and  $r^2$  are derived from Spearman rank correlation and linear regression respectively. Data presented are from n=19-20 and significant correlations are shown in bold.

**Figure S4**

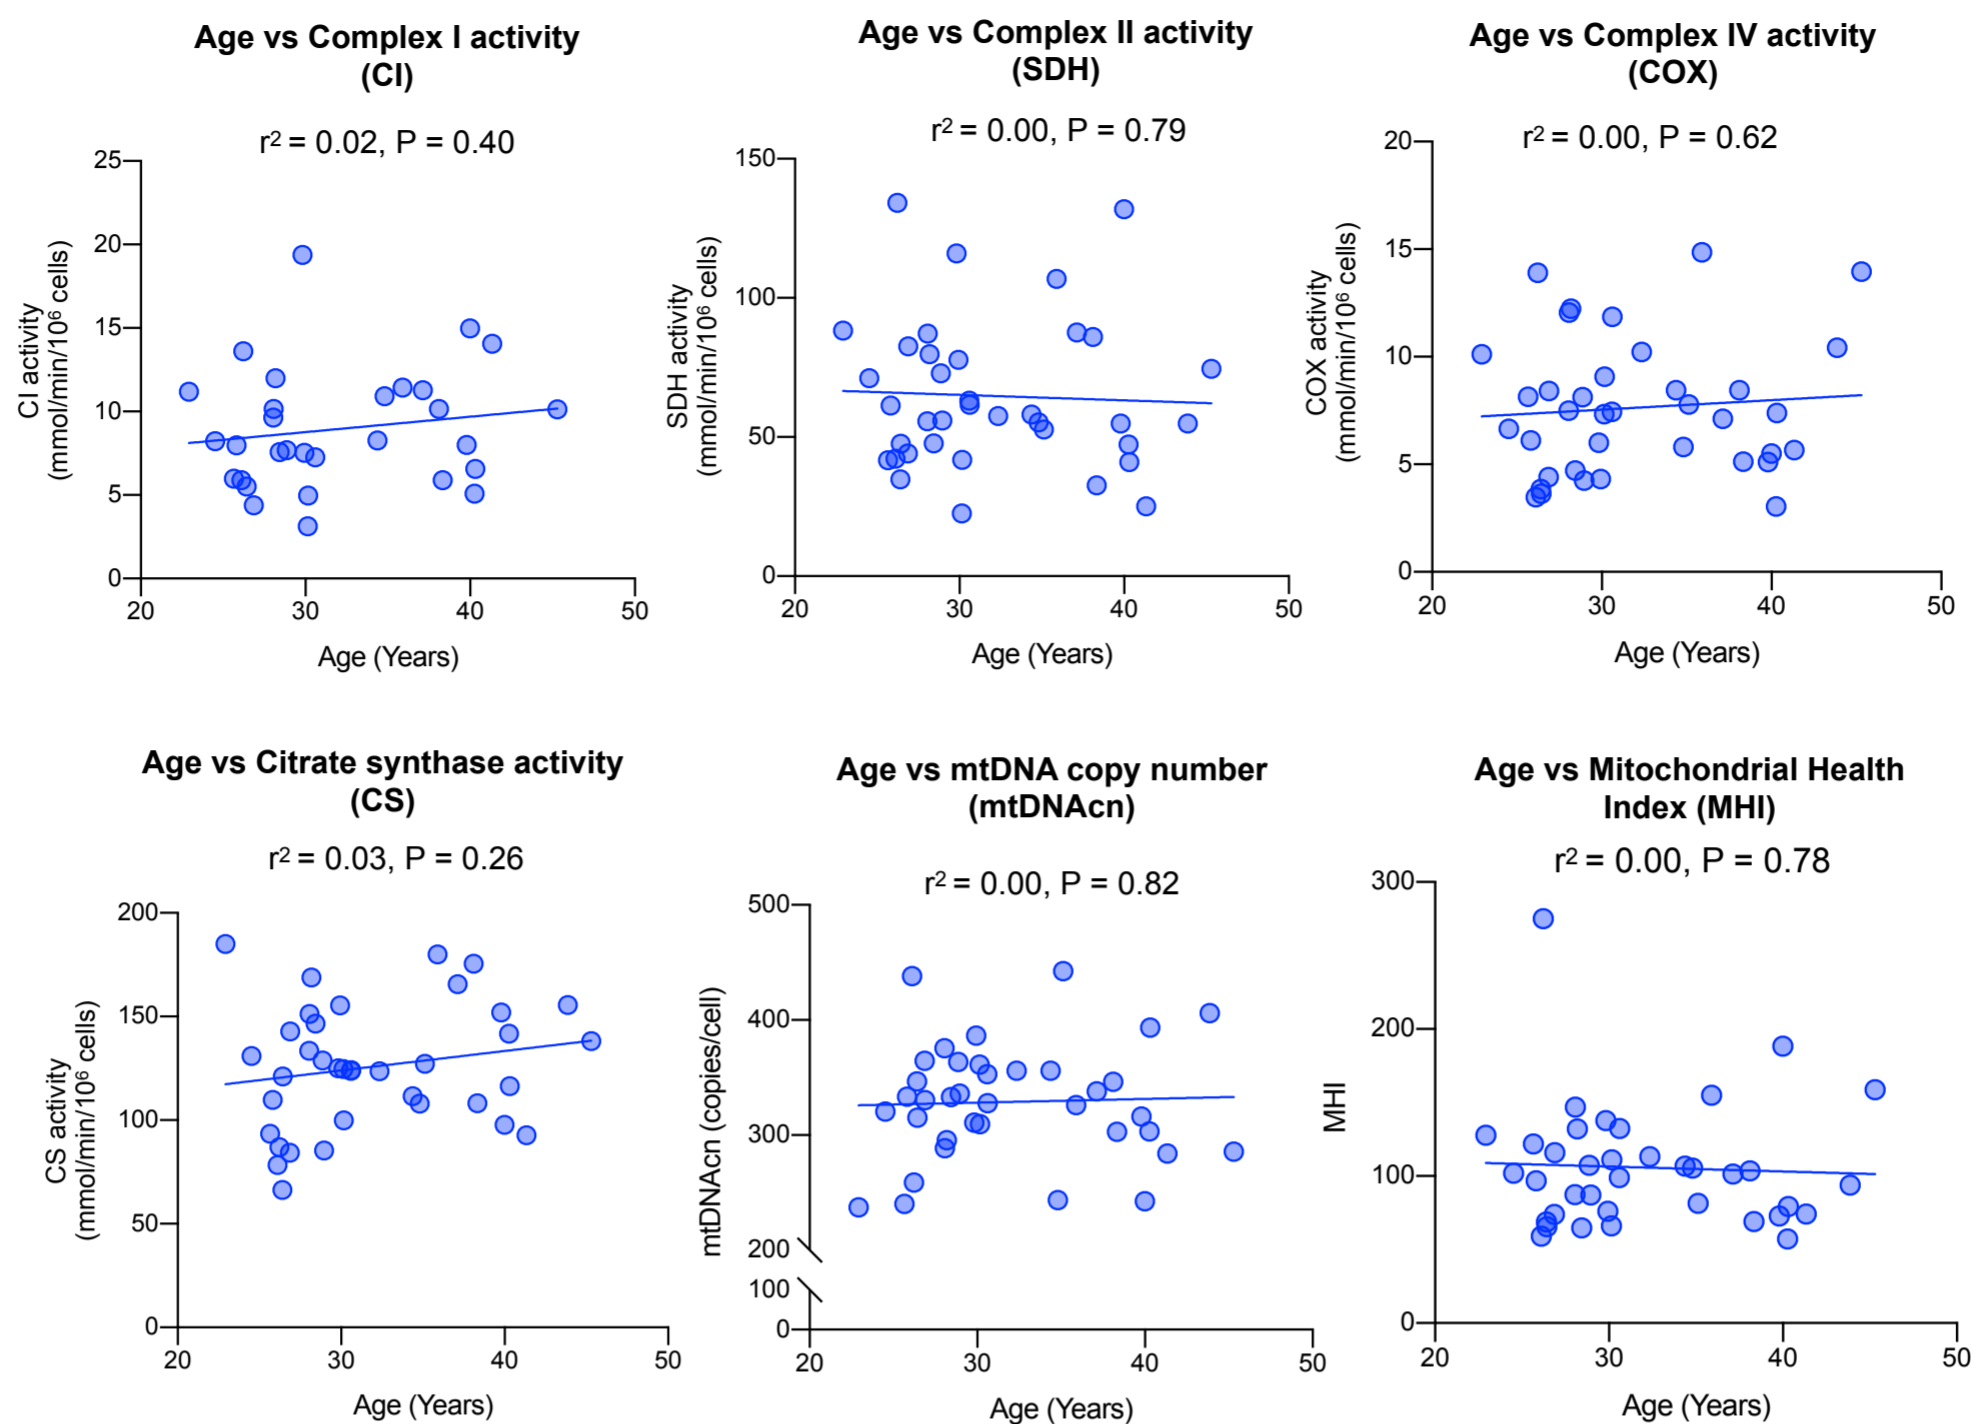

**Figure S4. Linear regressions (Pearson  $r$ ) between the age of participants in Cohort 2 and their baseline mitochondrial measures. Age does not correlate with mitochondrial enzyme activities of Complex I, II (SDH), IV (COX), mitochondrial content (CS), copy number (mtDNAcn) and mitochondrial health (MHI).  $n=37$  except mtDNAcn ( $n=30$ ).**
